# Supplementary material for: Genomic amplification upregulates estrogen-related receptor alpha and its depletion inhibits oral squamous cell carcinoma tumors in vivo
Source: PubMed Central journal article supplement (PMC4671026; doi:10.1038/srep17621), 2015-12-07
Supplement: srep17621-s1.pdf [file srep17621-s1.pdf]

**Supplementary information**

**Genomic amplification upregulates estrogen-related receptor alpha and its depletion inhibits oral squamous cell carcinoma tumors *in vivo***

Ankana Tiwari, Shivananda Swamy, Kodaganur S. Gopinath and Arun Kumar

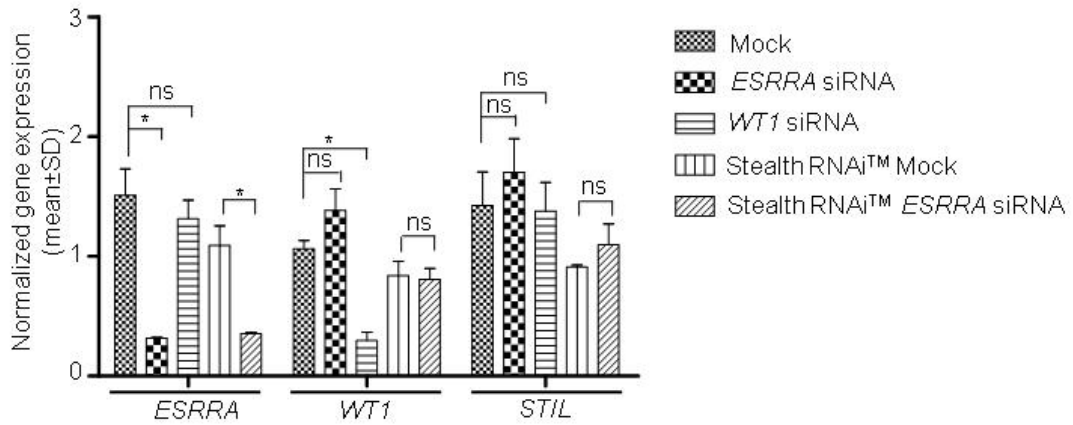

**Supplementary Figure S1. The qRT-PCR analysis of *ESRRR*, *WT1* and *STIL* expression in SCC084 cells transfected with siRNAs targeting *ESRRR* and *WT1*.** Note, SCC084 cells transfected with *ESRRR* siRNA show a significant knock down of *ESRRR*. siRNA targeting *WT1* was used as a control. \*,  $p < 0.05$ ; and ns, non-significant.

**Supplementary Table S1.** Details of clinicopathological features of patients and molecular data.

| Sl.# | Pt (sample) # | Age (yr)/Sex | Site of the tumor    | TNM     | Tob/Alco/Bet/Smok usage    | ESRRA (amplification) | ESRRA (mR NA) | ESRRA (Protein) |
|------|---------------|--------------|----------------------|---------|----------------------------|-----------------------|---------------|-----------------|
| 1    | 9             | 45M          | Tongue-anterior 2/3  | T4N2M0  | Chronic Tob chewing        | Yes                   | Up            | Up              |
| 2    | 63            | 40F          | BM                   | T4aN1MX | Chronic Tob chewing        | Yes                   | Up            | Up              |
| 3    | 92            | 50F          | BM                   | T4N2bM0 | Chronic Tob chewing        | Yes                   | Up            | Up              |
| 4    | 149           | 50M          | BM                   | T4N2cMx | Tob chewing                | No                    | Up            | Up              |
| 5    | 152           | 65F          | BM                   | T4N1M0  | Tob chewing                | No                    | Up            | Up              |
| 6    | 162           | 55F          | BM                   | T2N0M0  | Chronic Tob chewing        | No                    | Up            | Up              |
| 7    | 172           | 57F          | BM                   | T3N0M0  | Chronic Bet chewing        | No                    | Up            | Up              |
| 8    | 184           | 38M          | Tongue-anterior 2/3  | T2N0M0  | No                         | Yes                   | Up            | Up              |
| 9    | 185           | 56M          | BM                   | T3N0M0  | No                         | No                    | Down          | N/D             |
| 10   | 187           | 83M          | BM                   | T2N1M0  | Chronic Smok               | No                    | Up            | Up              |
| 11   | 188           | 33M          | Tongue, anterior 2/3 | T4N0M0  | No                         | Yes                   | Up            | Up              |
| 12   | 194           | 48F          | GBS                  | T4N2bM0 | Chronic Tob chewing        | No                    | Down          | Down            |
| 13   | 197           | 59M          | BM                   | T2N0M0  | Smok and Alco              | Yes                   | Up            | Up              |
| 14   | 199           | 50M          | BM                   | T4N2M0  | Tob chewing                | No                    | Down          | No change       |
| 15   | 204           | 70M          | BM                   | T3N1M0  | Chronic Tob chewing        | No                    | Up            | N/D             |
| 16   | 206           | 44M          | Tongue-anterior 2/3  | T3N2bM0 | Chronic Tob chewing        | No                    | Up            | Up              |
| 17   | 211           | 65M          | BM                   | T2N0M0  | No                         | No                    | Up            | N/D             |
| 18   | 213           | 37M          | Tongue, anterior 2/3 | T3N0M0  | No                         | No                    | Up            | Up              |
| 19   | 215           | 65F          | BM                   | T2N1M0  | No                         | No                    | No change     | N/D             |
| 20   | 217           | 45F          | BM                   | T3N1M0  | Chronic Bet chewing        | No                    | Up            | N/D             |
| 21   | 219           | 68M          | BM                   | T3N2bM0 | Chronic Tob chewing        | No                    | Up            | Up              |
| 22   | 227           | 227          | BM                   | T1N1M0  | Tob chewing and Smok       | No                    | No change     | N/D             |
| 23   | 228           | 54F          | BM                   | T2N0M0  | Tob chewing                | No                    | Down          | N/D             |
| 24   | 233           | 50F          | BM                   | T2N0M0  | Tob chewing                | No                    | Up            | Up              |
| 25   | 234           | 58M          | Tongue, anterior 2/3 | T2N0M0  | Bet and Betel quid chewing | No                    | Up            | N/D             |

Abbreviations: Pt#, patient number; M, male; F, female; BM, buccal mucosa; GBS, gingivo-buccal sulcus; TNM, tumor node metastasis; Tob, tobacco; Alco, alcohol; Bet, betelnut; Smok, smoking; yes, amplified; no, not amplified; up, upregulated; down, downregulated; and, N/D, experiment not done.

**Supplementary Table S2.** Details of primers used in qPCR and qRT-PCR.

| Gene            | Sequence (5' to 3')                                                                                                                                                                                     | Amplicon size (bp) | Annealing temperature (°C) | Reference |
|-----------------|---------------------------------------------------------------------------------------------------------------------------------------------------------------------------------------------------------|--------------------|----------------------------|-----------|
| <i>ESRRA</i>    | F: CGAGAGGAGTATGTTCTAC<br>R: TGCAGAGCTTCTCGCAGCT                                                                                                                                                        | 110                | 59                         |           |
| <i>GAPDH</i>    | F:GAAGGGTGAAGGTCGGAGTC<br>R:GAAGATGGTGATGGGATTTTC                                                                                                                                                       | 226                | 60                         |           |
| <i>WNT11</i>    | F: GGACACAAGACAGGCAGTGCA<br>R:CCTCACTTGCAGACATAGCG                                                                                                                                                      | 190                | 60                         |           |
| <i>OPN</i>      | F:AGACCTGACATCCAGTACCCTG<br>R:GTGGGTTTCAGCACTCTGGT                                                                                                                                                      | 189                | 60                         |           |
| <i>WT1</i>      | F:TCTTGTACGGTTCGGCATCTGAG<br>R:GTTACAGTCCTTGAAGTCACAC                                                                                                                                                   | 158                | 58                         |           |
| <i>STIL</i>     | F:CTTAAGCAACTAAGAAGCCTTGGAG<br>R: GCCTCCATGCTCAAATCCACACCA                                                                                                                                              | 197                | 49                         | 1         |
| <i>miR-125a</i> | RT6-miR-125a:<br>TGTCAGGCAACCGTATTCACCGTGAGTGG<br>TTCACAG<br>Short-miR-125a:<br>CGTCAGATGTCCGAGTAGAGGGGAACG<br>GCGTCCCTGAGACCCTTTAACC<br><br>MP-F: TGTCAGGCAACCGTATTCACC<br>MP-R: CGTCAGATGTCCGAGTAGAGG | 86                 | 56                         | 2, 3      |
| <i>5S RNA</i>   | F:GCCCGATCTCGTCTGATCT<br>R:AGCCTACAGCACCCGGTATT                                                                                                                                                         | 110                | 60                         | 3         |

Abbreviations: F, forward primer; and R, reverse primer.

**Supplementary Table S3.** Details of primers used in cloning.

| Construct      | Cloning vector | Sequence (5' to 3')                                                                                                 | Amplicon size (bp) | Annealing temperature (°C) |
|----------------|----------------|---------------------------------------------------------------------------------------------------------------------|--------------------|----------------------------|
| p <i>ESRRA</i> | pcDNA3.1(+)    | F: TAGCAAGCTTATGTCCAGCCAGGTGGTGGGCATTG<br><i>Hind</i> III<br>R: TGACGAATTCGAGGAGAGGGCGTGGGGCCTGTTC<br><i>Eco</i> RI | 1432               | 52                         |

Abbreviations: F, forward primer; and R, reverse primer.

## References

1. Kumar, A., Girimaji, S. C., Duvvari, M. R. & Blanton, S. H. Mutations in *STIL*, encoding a pericentriolar and centrosomal protein, cause primary microcephaly. *Am. J. Hum. Genet.* **84**, 286-290 (2009).
2. Tiwari, A., Shivananda, S., Gopinath, K. S. & Kumar, A. microRNA-125a reduces proliferation and invasion of oral squamous cell carcinoma cells by targeting estrogen-related receptoralpha: implications for cancer therapeutics. *J. Biol. Chem.* **289**, 32276-32290 (2014).
3. Sharbati-Tehrani, S., Kutz-Lohroff, B., Bergbauer, R., Scholven, J. & Einspanier, R. miR-Q: a novel quantitative RT-PCR approach for the expression profiling of small RNA molecules such as miRNAs in a complex sample. *BMC Mol. Biol.* **9**, 34 (2008).
